# Supplementary material for: Psychometric Properties of the Concise Associated Symptom Tracking Scale and Validation of Clinical Utility in the EMBARC Study
Source: Atypon-hosted journal article supplement (doi:10.1176/appi.prcp.20190041), 2020-02-07
Supplement: rcp21003-sup-0001-suppl-data.pdf [file rcp21003-sup-0001-suppl-data.pdf]

**Supplementary table ST1.** Results of logistic regression analyses using computed HAMD-17 (cHAMD-17) in CO-MED trial

|                                          | Remission at week-8 |        |          |        | No-meaningful-benefit at week-8 |        |          |        |
|------------------------------------------|---------------------|--------|----------|--------|---------------------------------|--------|----------|--------|
|                                          | Estimate            | SE     | $\chi^2$ | p      | Estimate                        | SE     | $\chi^2$ | p      |
| Intercept                                | -0.2635             | 0.6695 | 0.1549   | 0.6939 | -0.6395                         | 0.6728 | 0.9034   | 0.3419 |
| Baseline cHAMD-17                        | 0.0843              | 0.0296 | 8.1192   | 0.0044 | -0.0073                         | 0.0305 | 0.0579   | 0.8098 |
| Baseline-to-week-4<br>change in cHAMD-17 | 3.5097              | 0.6256 | 31.4782  | <0.001 | 0.0575                          | 0.0399 | 31.2506  | <0.001 |
| Baseline CAST-IRR                        | -0.0608             | 0.0375 | 2.6321   | 0.1047 | -3.5835                         | 0.6410 | 2.0696   | 0.1503 |
| Baseline-to-week-4<br>change in CAST-IRR | 2.0955              | 0.5960 | 12.3623  | 0.0004 | -1.3869                         | 0.6351 | 4.7684   | 0.0290 |

Footnote: We computed 17-item Hamilton Depression Rating scale (cHAMD-17) using the following formula:  $HAMD-17 = 0.11 + 0.53*(IDS-C)$ , per Vittengl et al. (15) in the Combining Medications to Enhance Depression Outcomes (CO-MED) trial. Remission and no-meaningful-benefit at week-8 were defined as cHAMD-17  $\leq 7$  and <30% reduction in cHAMD-17 from baseline respectively. Irritability was measured with the irritability domain of Concise Associated Symptom Tracking scale (CAST-IRR).
